# Supplementary material for: Gli pathway-targeted Co(iii) Schiff base complexes inhibit migration of basal cell carcinoma cells
Source: Royal Society of Chemistry journal article supplement (doi:10.1039/d5ra00326a), 2025-01-01
Supplement: d5ra00326a1.pdf [file d5ra00326a1.pdf]

## Supporting Information

### Gli Pathway-Targeted Co(III) Schiff Base Complexes Inhibit Migration of Basal Cell Carcinoma Cells

*Caroline E. Bond<sup>a</sup>, Keaton D. Olson<sup>a,‡</sup>, Metehan Punar<sup>a,‡</sup>, Lillian B. Friedman<sup>a</sup>, Jian-Hong Tang<sup>a,c</sup>, Minrui Luo<sup>a</sup>, Matthew D. Bailey<sup>a</sup>, Robert A. Holmgren<sup>b</sup>, and Thomas J. Meade<sup>a,†</sup>*

<sup>a</sup>. Departments of Chemistry, Molecular Biosciences, Neurobiology, and Radiology, Northwestern University, 2145 Sheridan Road, Evanston, Illinois 60208-3113

<sup>b</sup>. Department of Molecular Biosciences, Northwestern University, 2145 Sheridan Road, Evanston, Illinois 60208-3113

<sup>c</sup>. Author now affiliated with School of Future Technology, University of Chinese Academy of Sciences, Beijing 101408, P. R. China

<sup>‡</sup> These authors contributed equally

<sup>†</sup>Correspondence author: tmeade@northwestern.edu

#### Table of Contents

|                                                                         |          |
|-------------------------------------------------------------------------|----------|
| <b>Section 1: Spectroscopic Data: MALDI and Circular Dichroism (CD)</b> | <b>2</b> |
| <b>Section 2: ASZ Experiment Data</b>                                   | <b>4</b> |
| <b>Section 2.1: ASZ Transwell Migration Experiment: Day 1</b>           | <b>4</b> |
| <b>Section 2.2: ASZ Transwell Migration Experiment: Day 2</b>           | <b>4</b> |
| <b>Section 2.3: ASZ Transwell Migration Experiment: Day 3</b>           | <b>6</b> |
| <b>Section 3: ASZ Stock Solution Concentrations</b>                     | <b>9</b> |

## Section 1: Spectroscopic Data: MALDI and Circular Dichroism (CD)

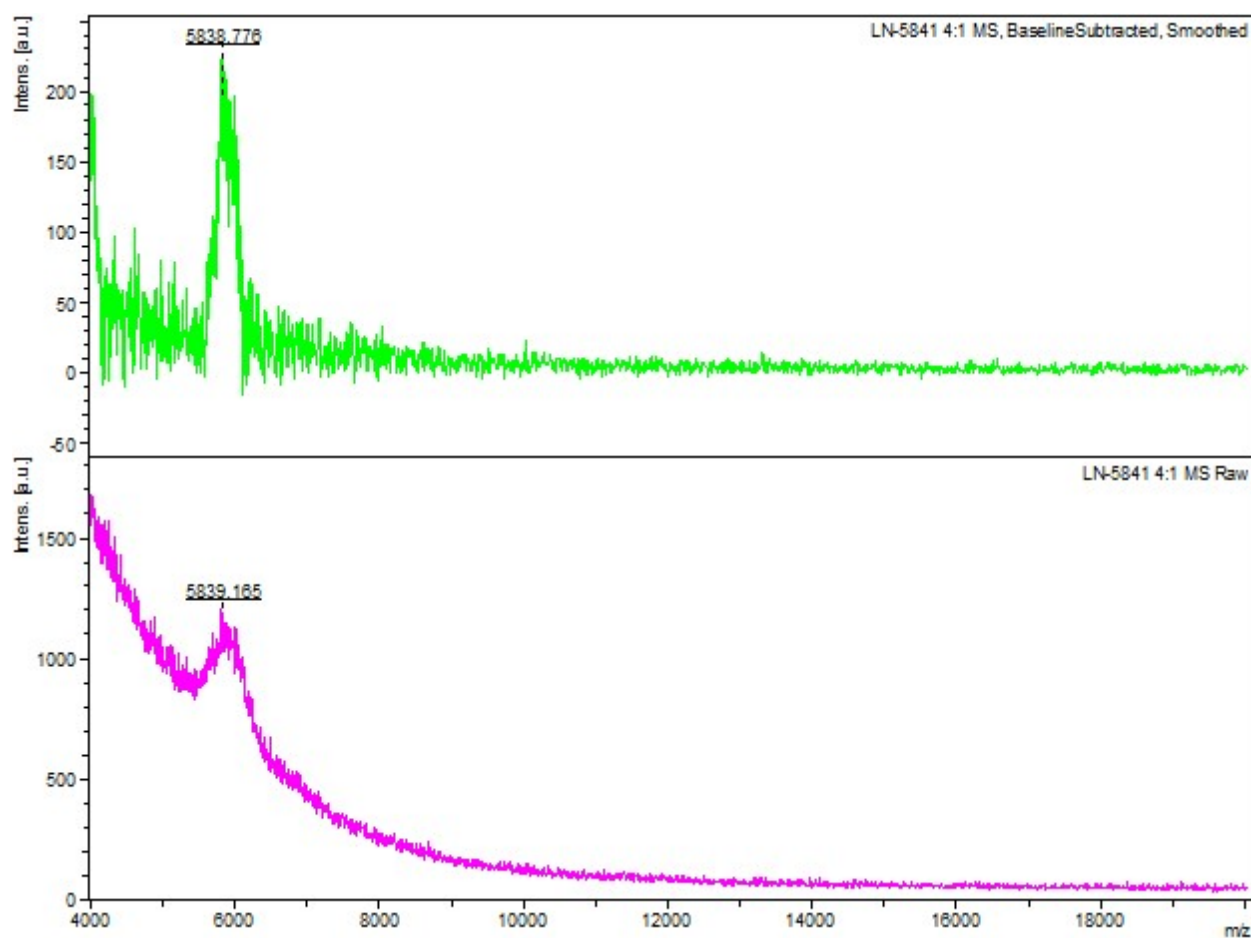

**Figure S1:** MALDI performed on Co-Gli ssDNA to confirm identity. Bottom) raw data for isolated ssDNA from HPLC purification. Top) Smoothened MALDI data for the Co-Gli ssDNA after applying a baseline subtraction. MS (MALDI-TOF) m/z:  $[M - H]^-$  Calcd for  $C_{188}H_{255}CoN_{62}O_{105}P_{17}S_6$ : 5838.972; Found: 5838.776.

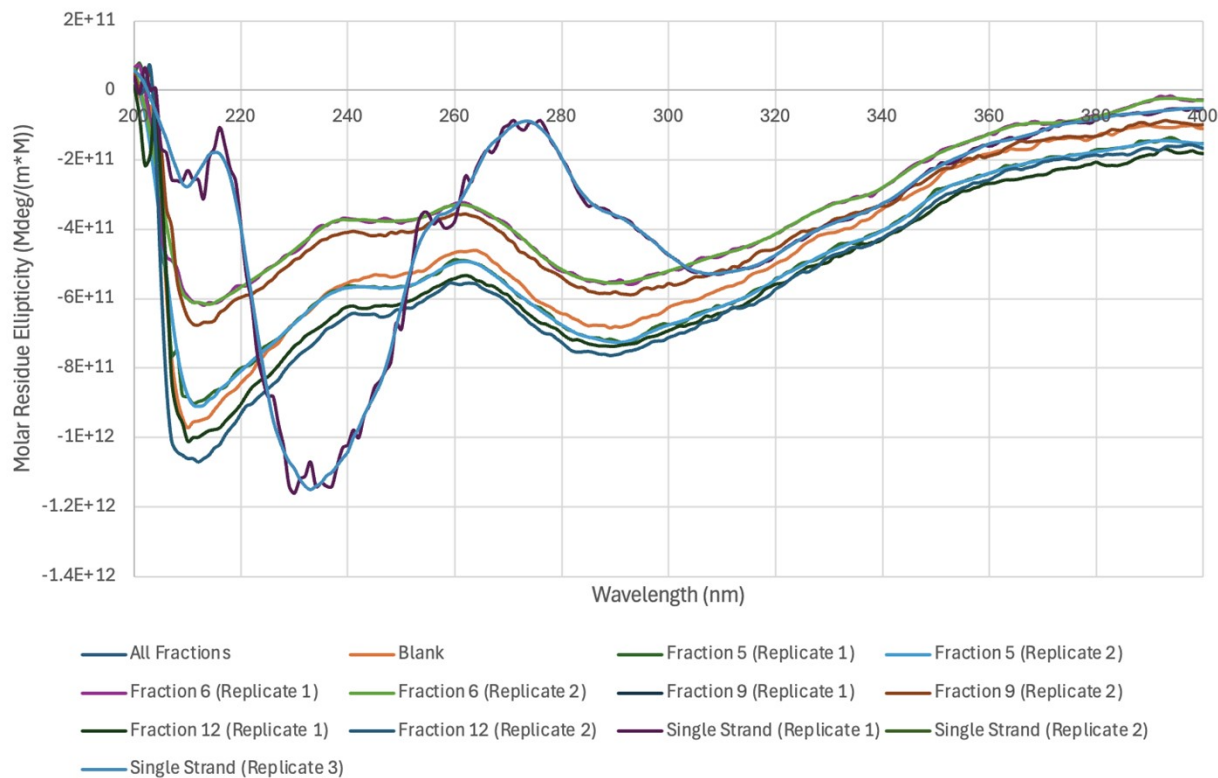

**Figure S2:** Circular Dichroism of Single Stranded and Double Stranded CoSB DNA. Post-DNA annealing fractions were collected from a G25 desalting column. CD was then run on each fraction for determination of annealing completion.

## Section 2: ASZ Experiment Data

### Section 2.1: ASZ Transwell Migration Experiments: Day 1

| Drug        | Volume of Cell Solution (uL) | Volume of Media (uL) |
|-------------|------------------------------|----------------------|
| CoGli-GOPEI | 94                           | 906                  |
| GOPEI       | 420                          | 1080                 |
| Cobalt      | 420                          | 1080                 |
| CoGli-GOPEI | 220                          | 780                  |
| Vismodegib  | 168                          | 832                  |
| GANT-61     | 201                          | 799                  |
| GANT-61     | 214                          | 786                  |

**Table S1:** Transwell Migration Experiments of ASZ cells on Day 1. Each Experiment utilized a 6-well plate (Corning) with approximately 300,000 cells per well via hemocytometry. With the exception of Experiment 4, each Experiment's well was diluted to a final volume of 1mL at the end of day 1: Experiment 4 was the first Experiment that was conducted and was carried out at 1.5mL. However, it was realized that resources would only allow for all of the remaining Experiments to be carried out if their final volumes were diluted to 1mL.

### Section 2.2: ASZ Transwell Migration Experiments: Day 2

| Drug        | Dose (uM) | Volume of Media (uL) | Volume of Drug (uL) |
|-------------|-----------|----------------------|---------------------|
| CoGli-GOPEI | 0         | 900                  | 0                   |
|             | 4         | 529                  | 371                 |
|             | 8.5       | 112                  | 788                 |
| GOPEI       | 0         | 900                  | 0                   |
|             | 4         | 899.5                | 0.53                |
|             | 8.5       | 898.8                | 1.13                |

|             |      |       |       |
|-------------|------|-------|-------|
| Cobalt      | 0    | 900   | 0     |
|             | 4    | 887.4 | 12.6  |
|             | 8.5  | 873.3 | 26.75 |
| CoGli-GOPEI | 0    | 900   | 0     |
|             | 1    | 807.3 | 92.7  |
|             | 2.5  | 668   | 231.8 |
| Vismodegib  | 0    | 900   | 0     |
|             | 0.1  | 898.2 | 1.8   |
|             | 0.25 | 895.5 | 4.5   |
|             | 0.5  | 891   | 9     |
|             | 1    | 882   | 18    |
| GANT-61     | 0    | 900   | 0     |
|             | 0.5  | 899.8 | 0.195 |
|             | 1    | 899.6 | 0.381 |
|             | 2.5  | 899.1 | 0.95  |
|             | 5    | 898.1 | 1.91  |
| GANT-61     | 0    | 900   | 0     |
|             | 10   | 896.2 | 3.81  |

**Table S2:** Transwell Migration Experiments of ASZ Cells on Day 2. On this day, the appropriate drug and its concentration were added into each well for each Experiment during media swapping (with the drug for each

Experiment specified in the leftmost column of the table and the dose for a given drug in the next column over). After appropriate drug addition, each well was diluted to a final volume of 900uL.

### ***Section 2.3: ASZ Transwell Migration Experiments: Day 3***

| Drug        | Dose (uM) | Component:Volume in Well (uL)            | Component:Volume in Insert (uL)                                    |
|-------------|-----------|------------------------------------------|--------------------------------------------------------------------|
| CoGli-GOPEI | 0         | Serum Media: 500                         | Serum Free Media: 500<br>*Cell Suspension:                         |
|             | 4         | Serum Media: 294<br>CoGli-GOPEI: 206     | Serum Free Media: 294<br>CoGli-GOPEI: 206<br>*Cell Suspension: 200 |
|             | 8.5       | Serum Media: 62<br>CoGli-GOPEI: 438      | Serum Free Media: 62<br>CoGli-GOPEI: 438<br>*Cell Suspension: 200  |
| GOPEI       | 0         | Serum Media: 500                         | Serum Free Media: 300<br>Cell Suspension: 200                      |
|             | 4         | Serum Media: 499.8<br>GOPEI: 0.3         | Serum Free Media: 299.8<br>GOPEI: 0.3<br>Cell Suspension: 200      |
|             | 8.5       | Serum Media: 499.4<br>GOPEI: 0.63        | Serum Free Media: 299.8<br>GOPEI: 0.63<br>Cell Suspension: 200     |
| Cobalt      | 0         | Serum Media: 500                         | Serum Free Media: 300<br>Cell Suspension: 200                      |
|             | 4         | Serum Media: 493<br>Cobalt: 7            | Serum Free Media: 293<br>Cobalt: 7<br>Cell Suspension: 200         |
|             | 8.5       | Serum Media: 485<br>Cobalt: 14.86        | Serum Free Media: 285<br>Cobalt: 14.86<br>Cell Suspension: 200     |
| CoGli-GOPEI | 0         | Serum Media: 500                         | Serum Free Media: 300<br>Cell Suspension: 200                      |
|             | 1         | Serum Media: 449.5<br>CoGli-GOPEI: 50.51 | Serum Free Media: 249.5<br>CoGli-GOPEI: 50.51                      |

|            |      |                                          |                                                                       |
|------------|------|------------------------------------------|-----------------------------------------------------------------------|
|            |      |                                          | Cell Suspension: 200                                                  |
|            | 2.5  | Serum Media: 371.2<br>CoGli-GOPEI: 128.8 | Serum Free Media: 371.2<br>CoGli-GOPEI: 128.8<br>Cell Suspension: 200 |
| Vismodegib | 0    | Serum Media: 500                         | Serum Free Media: 300<br>Cell Suspension: 200                         |
|            | 0.1  | Serum Media: 499<br>Vismodegib: 1        | Serum Free Media: 299<br>Vismodegib: 1<br>Cell Suspension: 200        |
|            | 0.25 | Serum Media: 497.5<br>Vismodegib: 2.5    | Serum Free Media: 297.5<br>Vismodegib: 2.5<br>Cell Suspension: 200    |
|            | 0.5  | Serum Media: 495<br>Vismodegib: 5        | Serum Free Media: 295<br>Vismodegib: 5<br>Cell Suspension: 200        |
|            | 1    | Serum Media: 490<br>Vismodegib: 10       | Serum Free Media: 290<br>Vismodegib: 10<br>Cell Suspension: 200       |
| GANT-61    | 0    | Serum Media: 500                         | Serum Free Media: 300<br>Cell Suspension: 200                         |
|            | 0.5  | Serum Media: 499.9<br>GANT-61: 0.1058    | Serum Free Media: 299.9<br>GANT-61: 0.1058<br>Cell Suspension: 200    |
|            | 1    | Serum Media: 499.8<br>GANT-61: 0.2116    | Serum Free Media: 299.8<br>GANT-61: 0.2116<br>Cell Suspension: 200    |
|            | 2.5  | Serum Media: 499.5<br>GANT-61: 0.529     | Serum Free Media: 299.5<br>GANT-61: 0.529<br>Cell Suspension: 200     |
|            | 5    | Serum Media: 498.9<br>GANT-61: 1.058     | Serum Free Media: 298.9<br>GANT-61: 1.058<br>Cell Suspension: 200     |
| GANT-61    | 0    | Serum Media: 500                         | Serum Free Media: 300<br>Cell Suspension: 200                         |
|            | 10   | Serum Media: 497.9<br>GANT-61: 2.116     | Serum Free Media: 297.9<br>GANT-61: 2.116<br>Cell Suspension: 200     |

**Table S3:** Transwell Migration Assays of ASZ cells that were dosed with appropriate drug concentrations for a given Experiment. The assays were carried out in 24 well plates that contained inserts. After passaging the cells in Table **S2**, the inserts were filled with the appropriate drug concentration, and cell suspension, then diluted to a final volume of 500uL with serum free media. The wells for a given dose and Experiment were also filled with appropriate drug concentrations and then diluted to a final volume of 500uL with serum free media. Once the final volume of the well was acquired, their respective inserts (that were staged in empty wells) were transferred to their wells.

(\* = Cell suspension was plated and adhered first with excess aspirated off after 2 hours. Then other components were added to the insert with already adhered cells)



### Section 3: ASZ Stock Solution Concentrations

| Compound         | Stock Solution Concentration |
|------------------|------------------------------|
| Cobalt bis-amine | 286.0 uM                     |
| GOPEI            | 1mL of 0.245 g/mL            |
| CoGli-GOPEI      | 9.708 uM                     |
| Vismodegib       | 50 uM                        |
| GANT-61          | 2,362.7 uM                   |

**Table S4:** Stock concentrations of Compounds used in the Transwell Migration Experiments.
